# Supplementary material for: Effective Removal of Pb(II) Ions by Electrospun PAN/Sago Lignin-Based Activated Carbon Nanofibers
Source: MDPI journal article supplement (doi:10.3390/molecules25133081), 2020-07-06
Supplement: s1 [file s1]

# Supplementary Materials on

## Effective Removal of Pb(II) Ions by Electrospun PAN/Sago Lignin-based Activated Carbon Nanofibers

Nurul Aida Nordin <sup>1</sup>, Norizah Abdul Rahman <sup>1,2\*</sup> and Abdul Halim Abdullah <sup>1,3</sup>

<sup>1</sup>Department of Chemistry, Faculty of Science, Universiti Putra Malaysia, 43400 UPM Serdang, Selangor, Malaysia.

<sup>2</sup>Materials Processing and Technology Laboratory, Institute of Advanced Technology, Universiti Putra Malaysia, 43400 UPM Serdang, Selangor, Malaysia.

<sup>3</sup>Materials Synthesis and Characterization Laboratory, Institute of Advanced Technology, UniversitiPutra Malaysia, 43400 UPM Serdang, Selangor, Malaysia.

\*Correspondence: a\_norizah@upm.edu.my

Supplementary Materials, 2 pages with 1 figure.

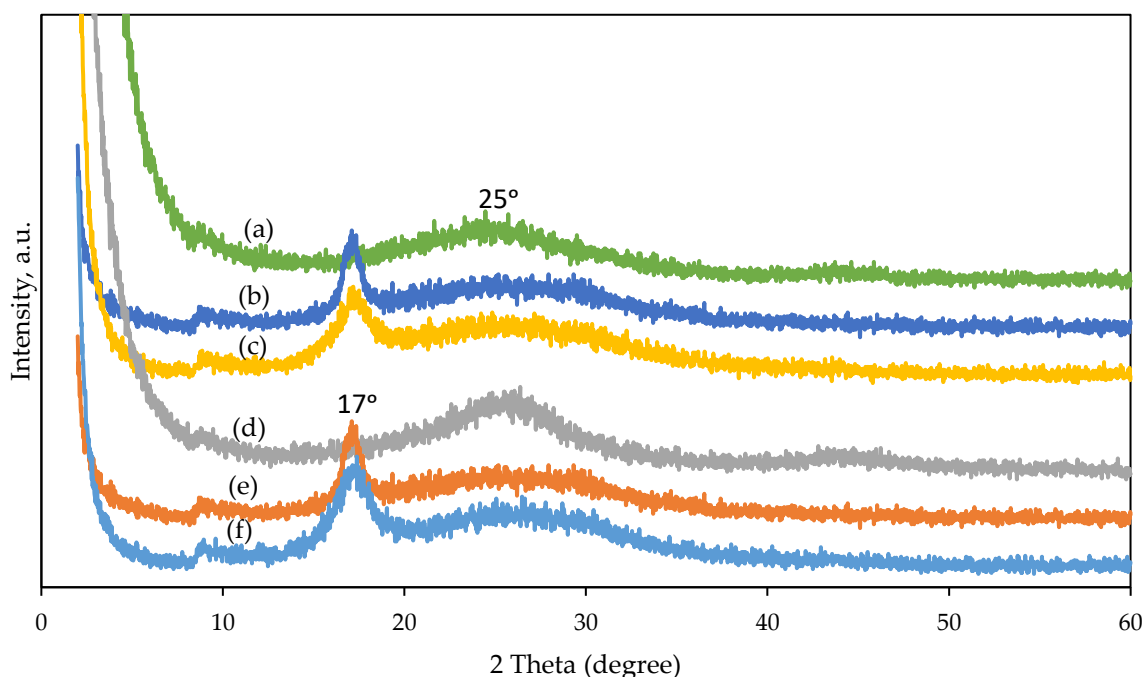

**Figure S1.** XRD pattern for PAN/SL (a) carbonized, (b) stabilized and (c) nanofibers, and PAN (d) carbonized, (e) stabilized and (f) nanofibers.

PAN/SL and PAN (nanofibers, after stabilization and after carbonization) were further characterized using XRD. From Figure S1, the XRD diffraction pattern of the nanofibers before and after stabilization show a strong peak at around 17° which can be ascribed to (100) crystallographic planes of PAN. However, this peak was decreased after carbonization due to the formation of ladder-like polymer structures of PAN [1]. After carbonization, a weak and broad peak was observed at around  $2\theta = 25^\circ$  which attributed to the (002) planes [2,3] which indicates that the carbon is amorphous [4] and the nanofibers were fully converted into carbon nanofibers.

## References

1. Seo, D.K.; et al. Preparation and characterization of the carbon nanofiber mat produced from electrospun PAN/Lignin precursors by electron beam irradiation. *Rev. Adv. Mater. Sci.* **2011**, *28*, 4.
2. Ji, L.; et al. Fabrication of carbon nanofiber-driven electrodes from electrospun polyacrylonitrile/polypyrrole bicomponents for high-performance rechargeable lithium-ion batteries. *Journal of Power Sources* **2010**, *195*, 2050–2056.
3. Zhu, J.; et al. Nitrogen-doped carbon nanofibers derived from polyacrylonitrile for use as anode material in sodium-ion batteries. *Carbon*, **2015**, *94*, 189–195.
4. Wang, Z.; et al. Functionalized N-doped interconnected carbon nanofibers as an anode material for sodium-ion storage with excellent performance. *Carbon*, **2013**, *55*, 328–334.
